# Supplementary material for: High Rate of Deformed Larvae among Gynogenetic Brown Trout (Salmo trutta m. fario) Doubled Haploids
Source: Hindawi journal article supplement (doi:10.1155/2017/2975187), 2017-01-01

Supplementary figures

Figure 1

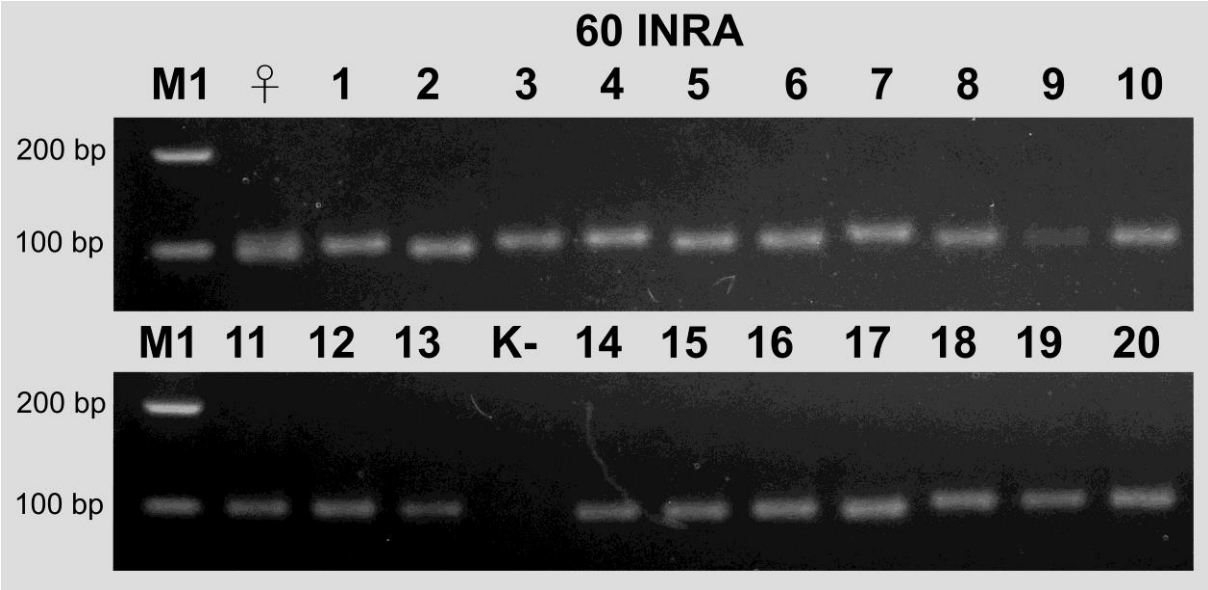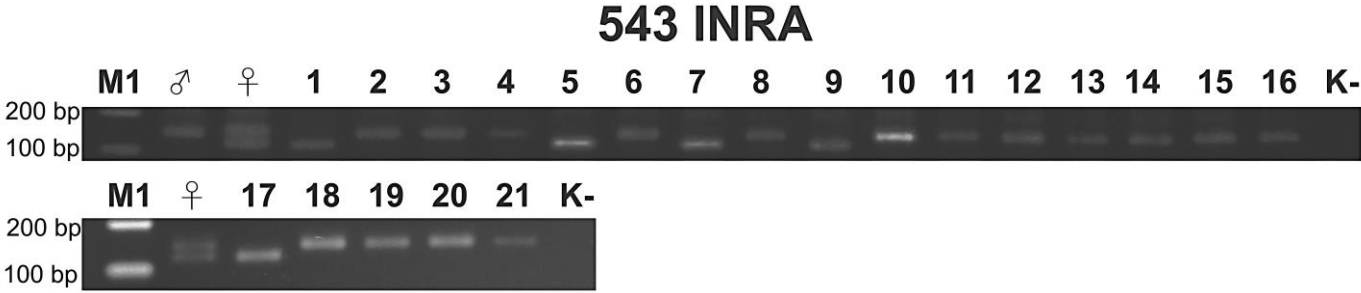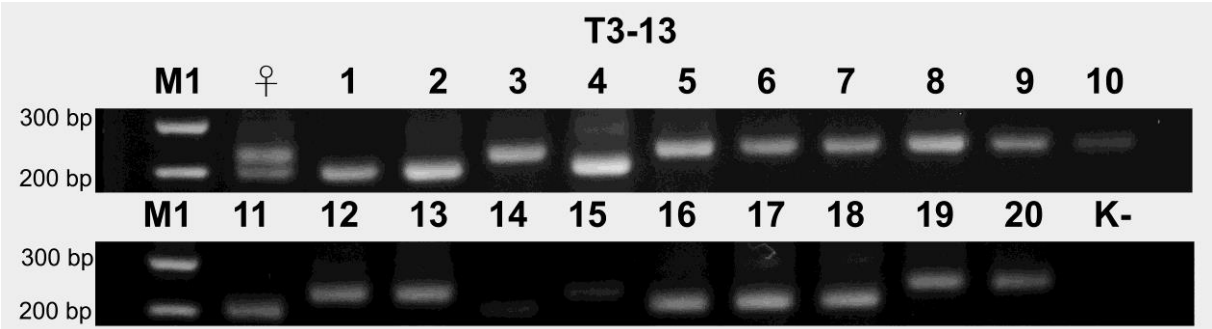

Figure 2

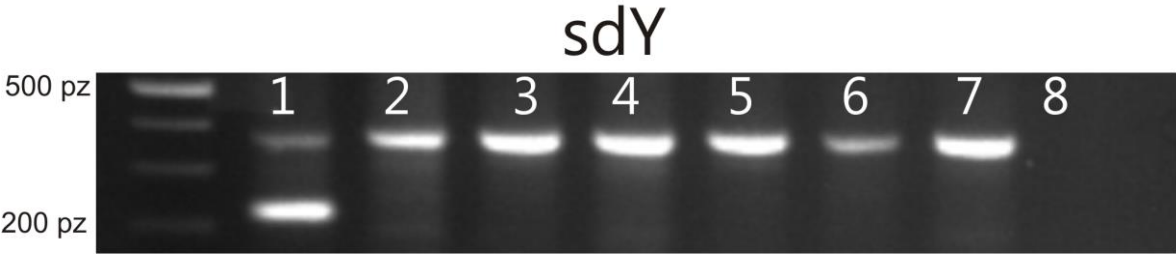

Supplement: f1 [file 2975187.f1.pdf]
